# Supplementary material for: Morphologically controlled rapid fabrication of rhodium sulfide (Rh2S3) thin films for superior and robust hydrogen evolution reaction
Source: Royal Society of Chemistry journal article supplement (doi:10.1039/d0se01423k), 2020-11-16
Supplement: d0se01423k1.pdf [file d0se01423k1.pdf]

## Supporting Information file

### Morphologically Controlled Rapid Fabrication of Rhodium Sulfide ( $\text{Rh}_2\text{S}_3$ ) Thin Films for Superior and Robust Hydrogen Evolution Reaction

Muhammad Ali Ehsan <sup>a</sup>, Alaaldin Adam <sup>a</sup>, Abdul Rehman <sup>b</sup>, Abbas Saeed Hakeem <sup>a</sup>,  
Anvarhusein A. Isab <sup>b</sup>, Mohammad Qamar <sup>a, c\*</sup>

<sup>a</sup> Center of Excellence in Nanotechnology (CENT), <sup>b</sup> Department of Chemistry, <sup>c</sup> K.A.CARE Energy Research & Innovation Center, King Fahd University of Petroleum and Minerals, Dhahran 31261, Saudi Arabia

\*Corresponding author – qamar@kfupm.edu.sa

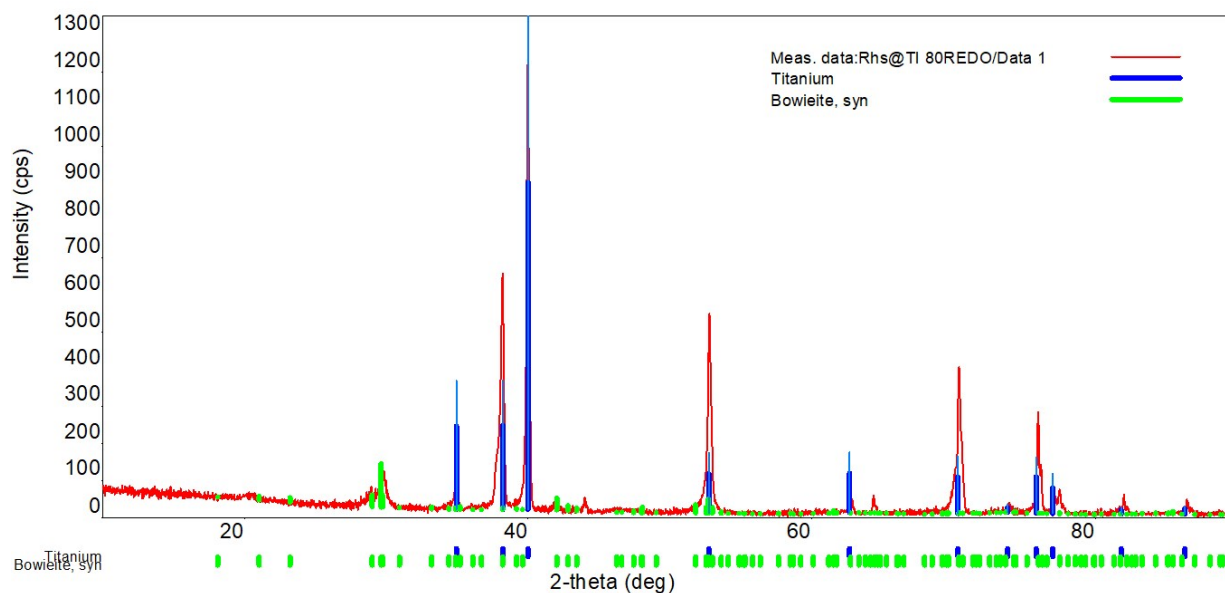

**Fig. S1(a):** XRD peak comparison analysis of  $\text{Rh}_2\text{S}_3$ -80 film sample deposited on Ti-foil for 80 minute of deposition time. Red line indicates the XRD peaks of as-synthesized  $\text{Rh}_2\text{S}_3$ -80 sample. Green bar lines indicate the standard Boweite, ((ICSD = 15344) while Blue bar lines indicate the peaks of standard Ti substrate.

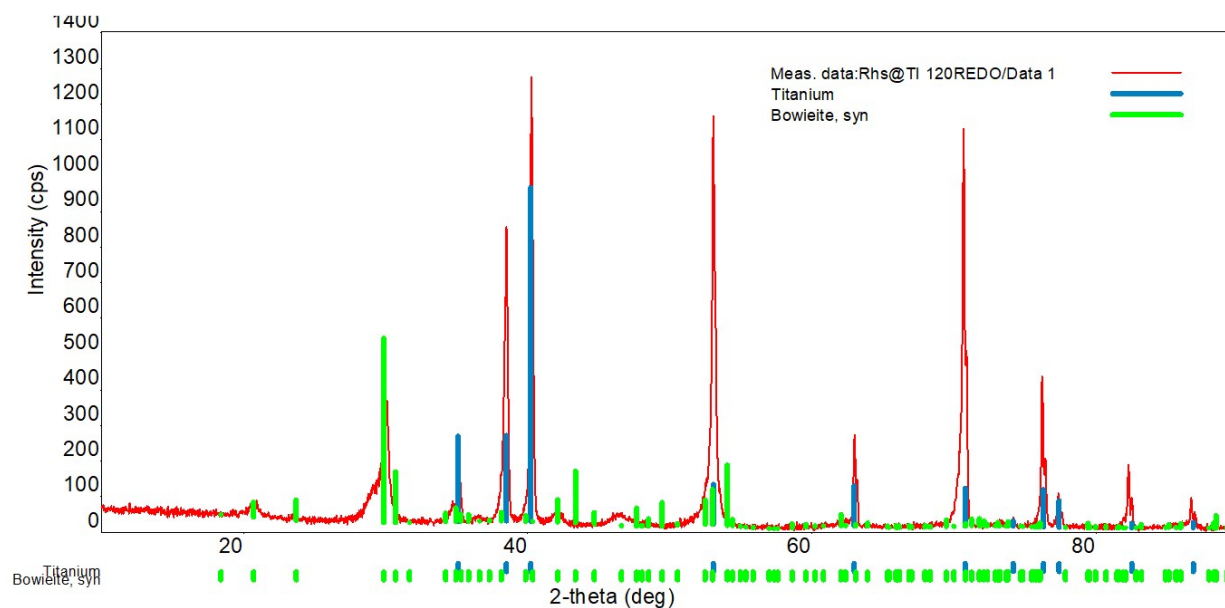

**Fig. S1(b):** XRD peak comparison analysis of Rh<sub>2</sub>S<sub>3</sub>-120 film sample deposited on Ti-foil for 120 minute of deposition time. Red line indicates the XRD peaks of as-synthesized Rh<sub>2</sub>S<sub>3</sub>-120 sample. Green bar lines indicate the standard Bowieite ((ICSD = 15344) while Blue bar lines indicate the peaks of standard Ti substrate .

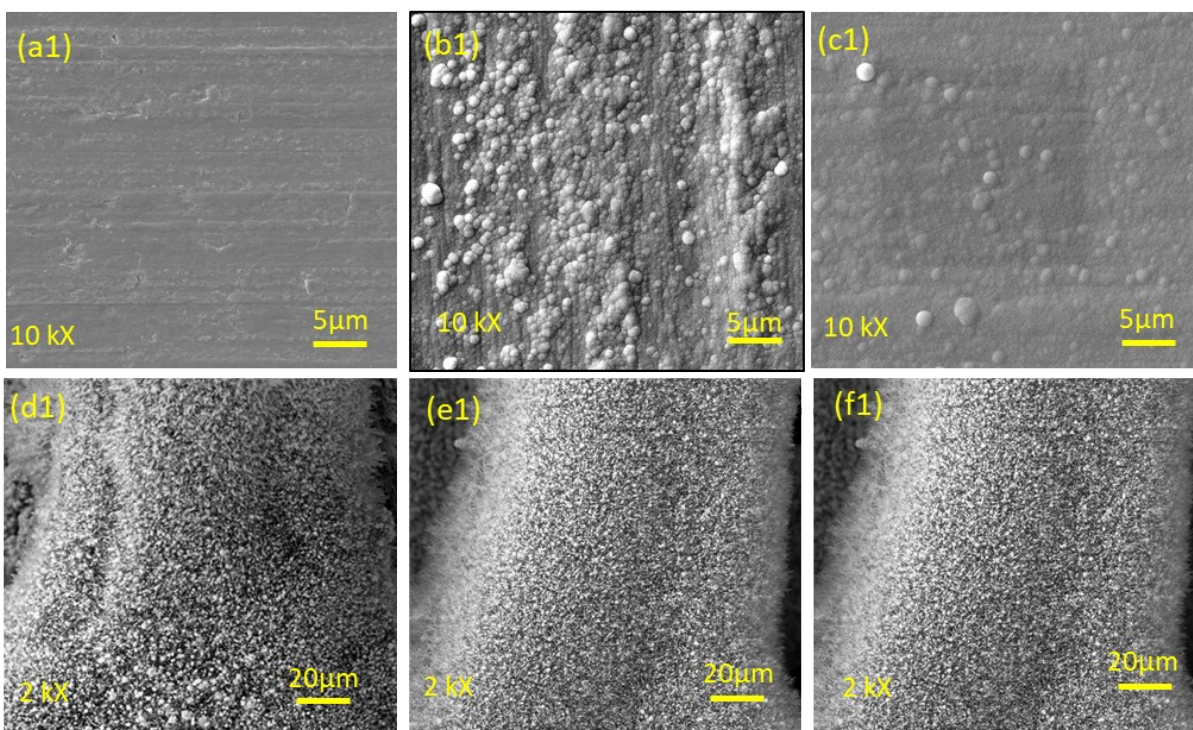

**Fig. S2:** Different low resolution FESEM images of the Rh<sub>2</sub>S<sub>3</sub> films, taken from two different substrates (a1)-(c1) Ti foil and (d1)-(f1) Ni foam for deposition times of 40 min (a1) & (d1), 80 min (b1) & (e1) and 120 min (c1) & (f1).

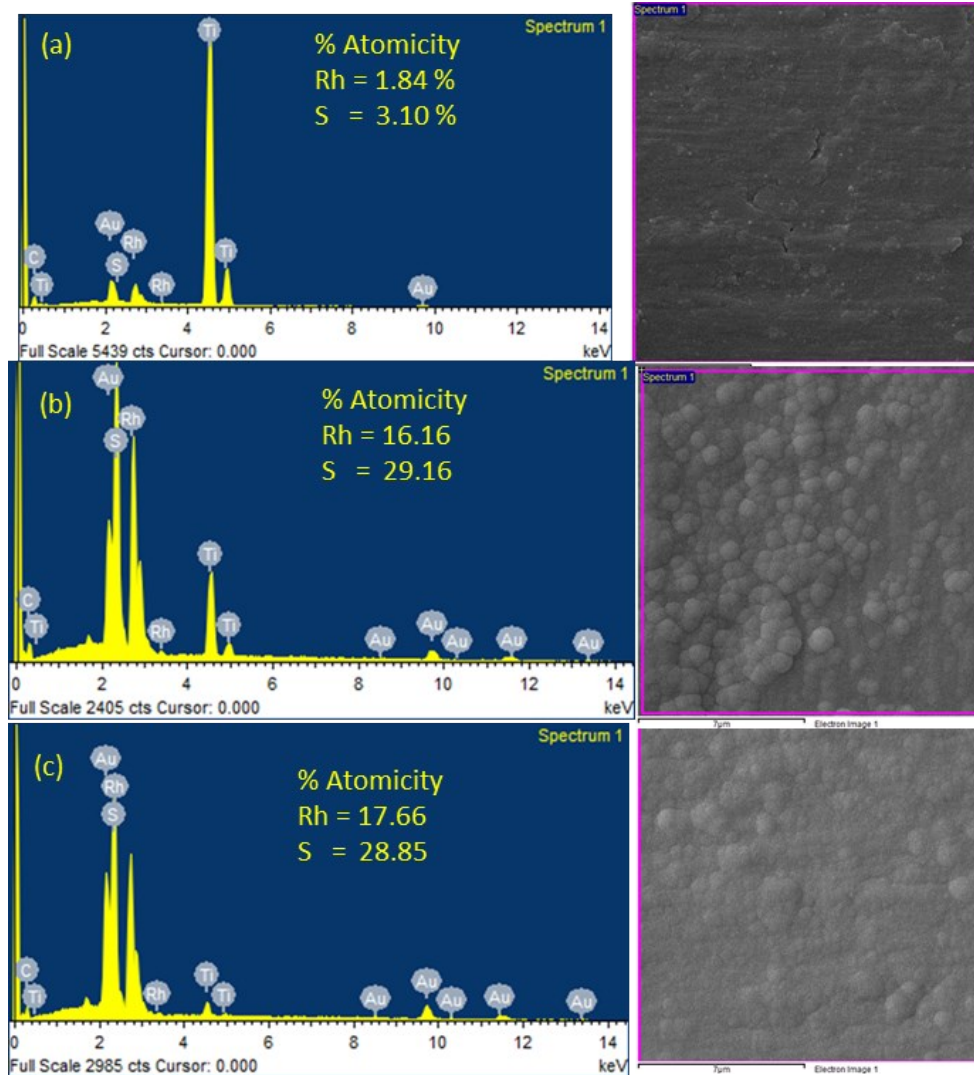

**Fig. S3(a):** EDX spectra of  $\text{Rh}_2\text{S}_3$  thin films deposition on Ti foil substrate for different deposition time of (a) 40 min (b) 80 min (c) 120 min.

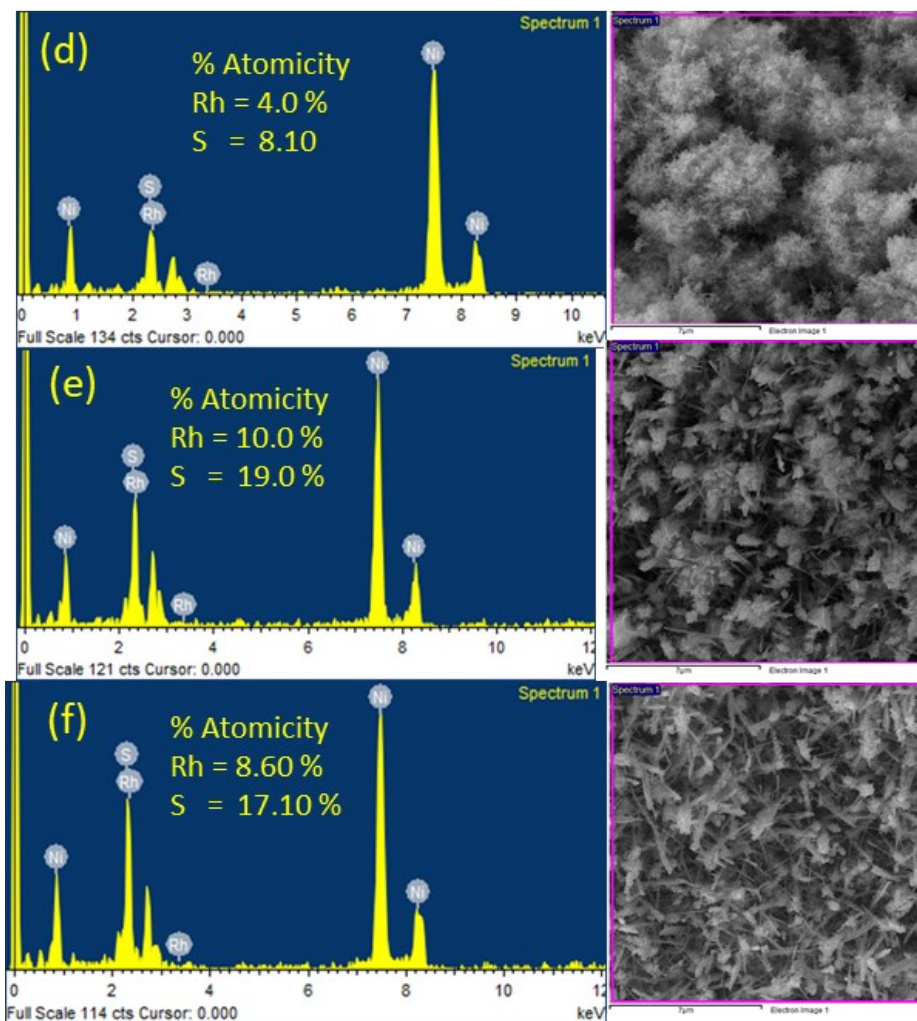

**Fig. S3(b):** EDX spectra of  $\text{Rh}_2\text{S}_3$  thin films deposition on Ni foam substrate for different deposition time of (d) 40 min (e) 80 min (f) 120 min.

Table S1: Percent (%) atomic ratios of Rh/S measured from Rh<sub>2</sub>S<sub>3</sub> films through EDX analysis.

| Substrate type | Deposition time (minutes ) | % Atomicity |       |
|----------------|----------------------------|-------------|-------|
|                |                            | Rh          | S     |
|                | 40                         | 1.84        | 3.10  |
| Ti-Foil        | 80                         | 16.16       | 29.16 |
|                | 120                        | 17.66       | 28.85 |
| Ni-Foam        | 40                         | 4.0         | 8.10  |
|                | 80                         | 10.0        | 19.0  |
|                | 120                        | 8.60        | 17.10 |

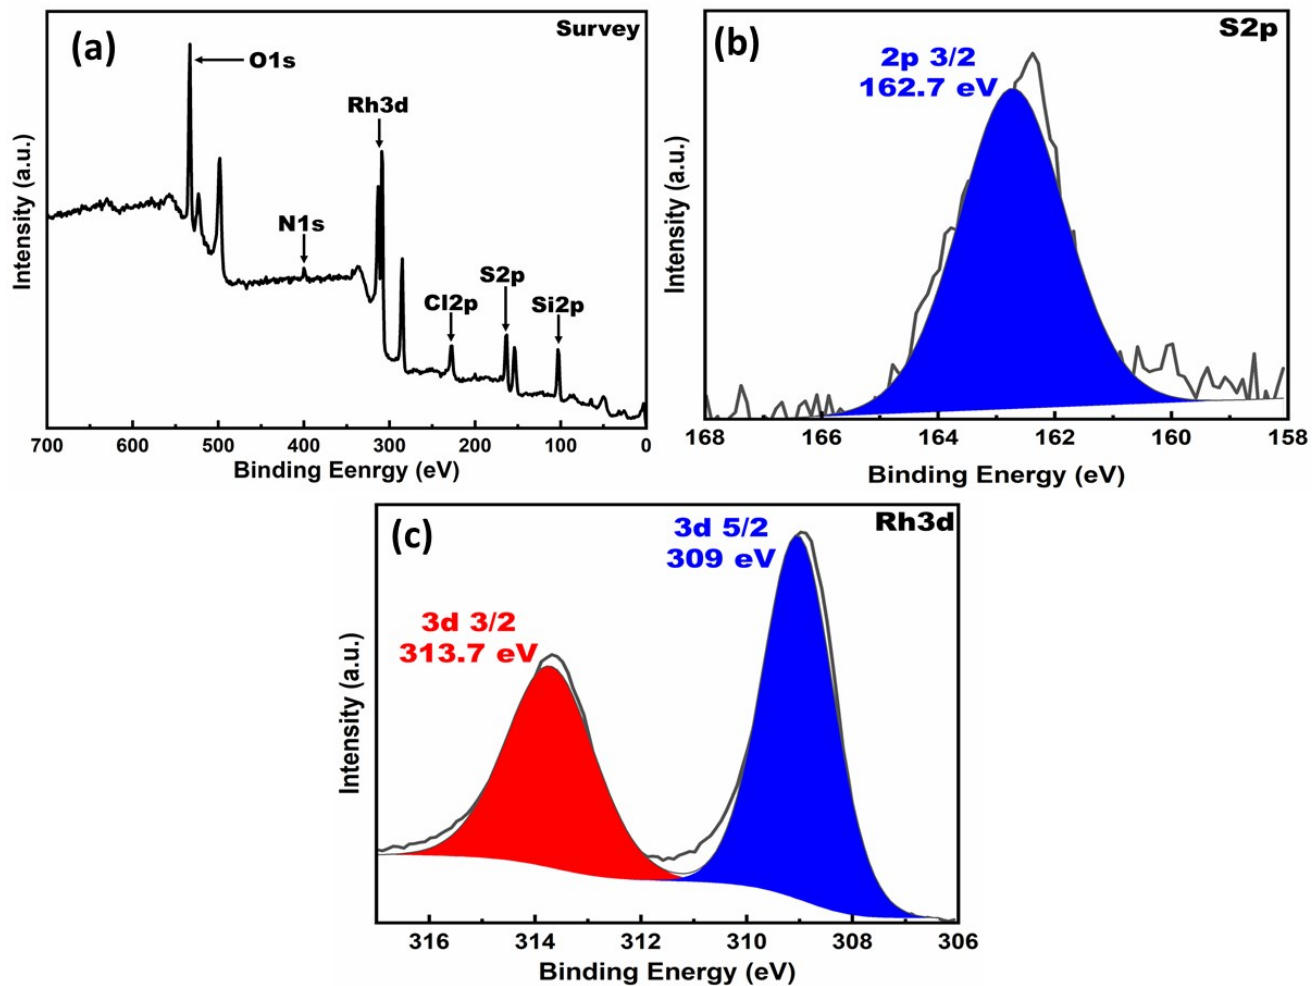

**Fig. S4:** XPS spectra of Rh<sub>2</sub>S<sub>3</sub> thin film prepared in 120 min: (a) Survey spectrum, (b) S2p, (c) Rh3d.
